# Supplementary material for: Synthesis and Characterizations of Na4MnCr(PO4)3/rGO as NASICON-Type Cathode Materials for Sodium-ion Batteries
Source: MDPI journal article supplement (doi:10.3390/polym14194046), 2022-09-27
Supplement: s1 [file s1]

## Electronic Supporting Information

### Synthesis and Characterizations of $\text{Na}_4\text{MnCr}(\text{PO}_4)_3/\text{rGO}$ as NASICON-type Cathode Materials for Sodium-ion Batteries

Bing-Hsuan Hsu and Wei-Ren Liu\*

*Department of Chemical Engineering, R&D Center for Membrane Technology,*

*Center for Circular Economy, Chung Yuan Christian University, 200 Chung Pei*

*Road, Chungli District, Taoyuan City 320, Taiwan*

\*E-mail address: [WRLiu1203@gmail.com](mailto:WRLiu1203@gmail.com);

Tel: +886 3-265-4140; Fax: +886 3-265-4199

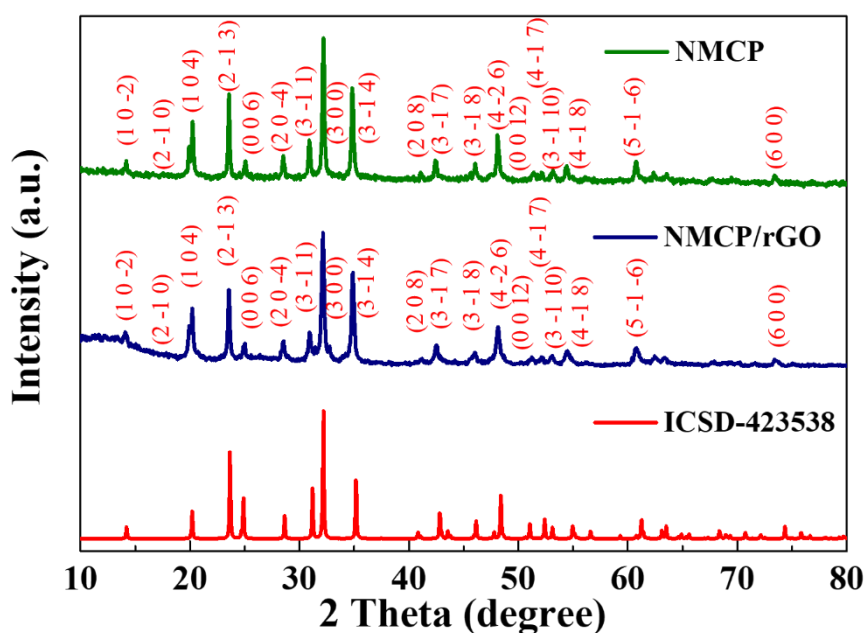

**Figure S1** X-ray diffraction (XRD) and corresponding Rietveld refinement results of NMCP.

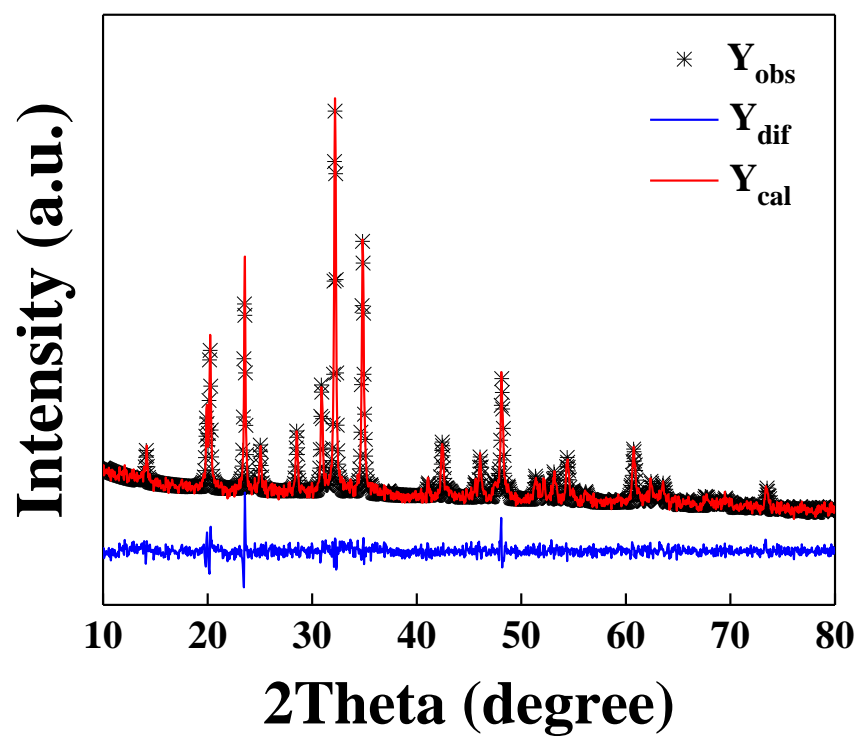

**Figure S2** X-ray diffraction (XRD) and corresponding Rietveld refinement results of NMCP.

**Table S1** Lattice parameters of pristine NMCP and as-synthesis NMCP/rGO.

| Samples  | a (Å) | c (Å)  | Cell volume (Å <sup>3</sup> ) | R <sub>wp</sub> |
|----------|-------|--------|-------------------------------|-----------------|
| NMCP     | 8.921 | 21.332 | 1470.245                      | 6.631           |
| NMCP/rGO | 8.912 | 21.396 | 1471.612                      | 10.821          |

**Table S2** Summary BET data of the NMCP and NMCP/rGO samples.

| Samples  | Surface area (m <sup>2</sup> /g) | Pore volume (m <sup>3</sup> /g) | Pore size (nm) |
|----------|----------------------------------|---------------------------------|----------------|
| NMCP     | 34.202                           | 0.0438                          | 5.801          |
| NMCP/rGO | 12.631                           | 0.0234                          | 7.8081         |

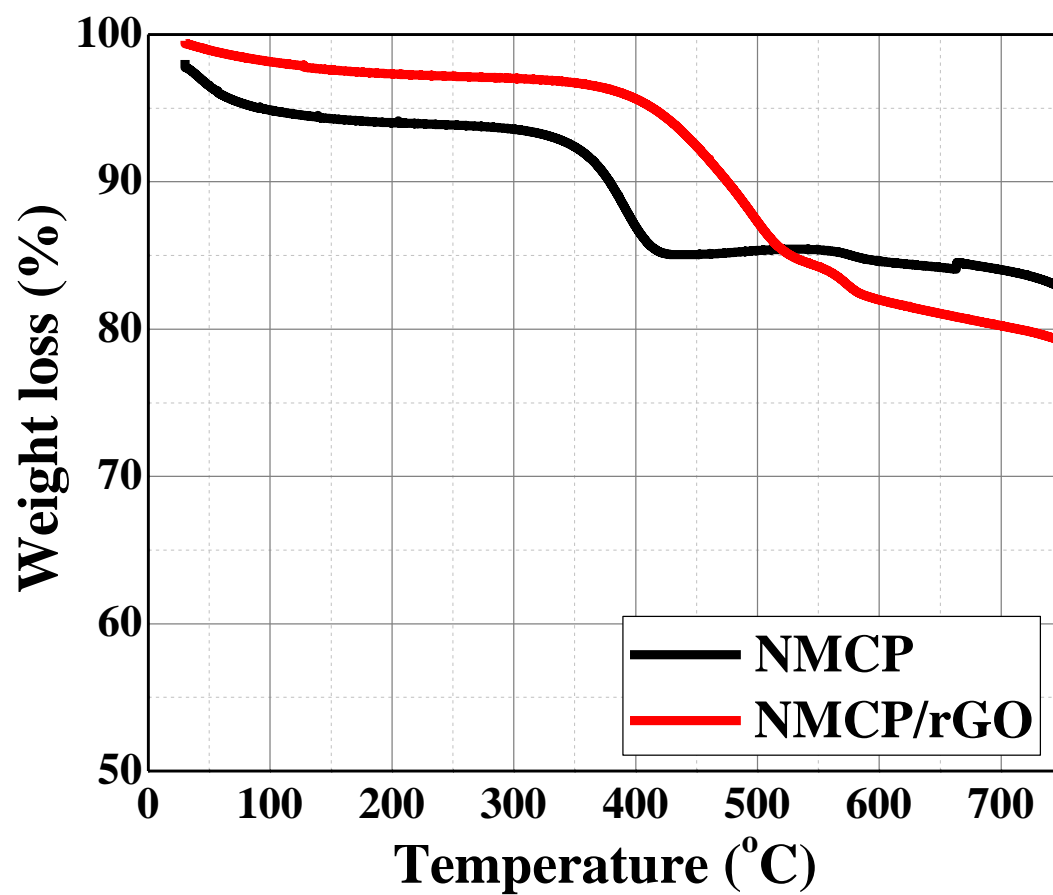

**Figure S3** TG analyses of pristine NMCP and NMCP/rGO composite under a heat rate of 5 °C/min in air.

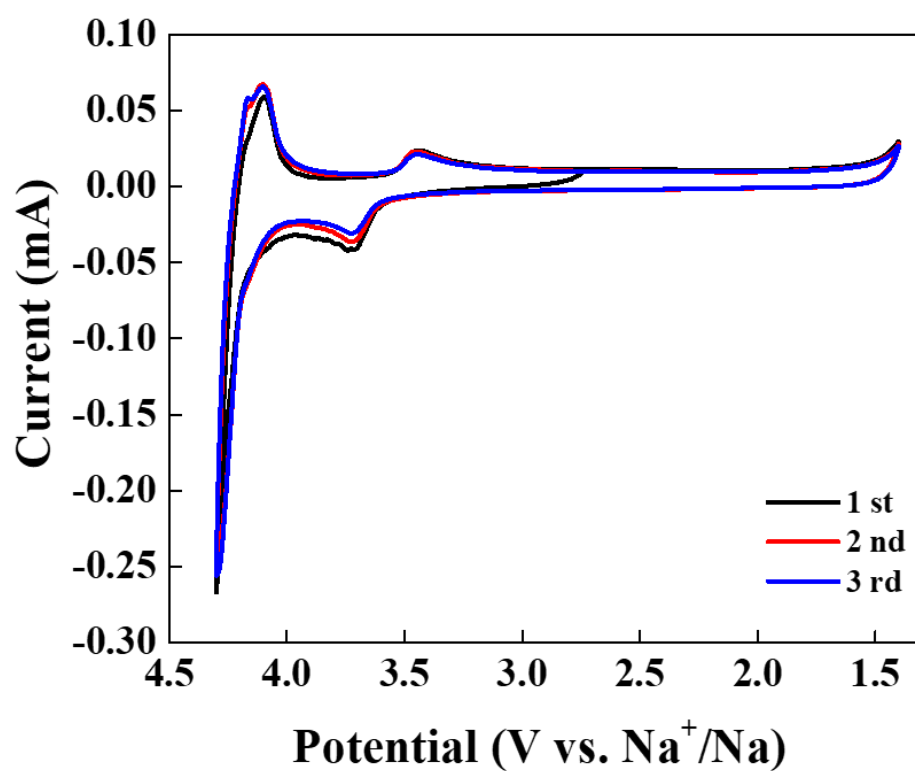

**Figure S4** Cyclic voltammetry profiles of pristine NMCP at 0.1 mV/s for three cycles.

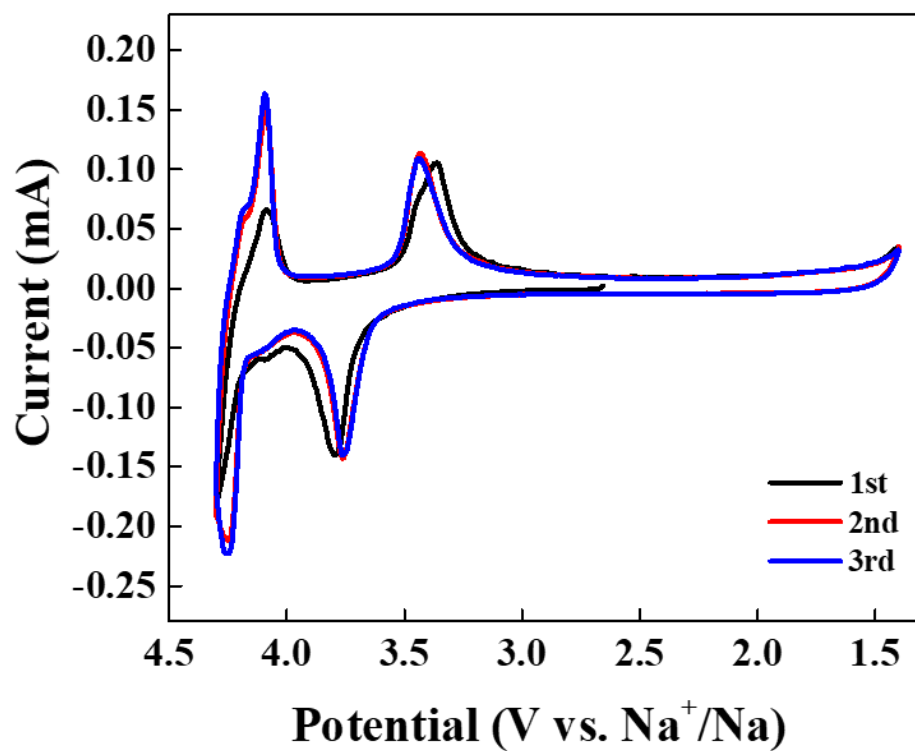

**Figure S5** Cyclic voltammetry profiles of as-synthesis NMCP/rGO at 0.1 mV/s for three cycles.

**Table S3** Electrode kinetic parameters obtained from equivalent circuit fitting of EIS

for NMCP and NMCP/rGO samples.

| Material | $R_s$ (ohm) | $R_{ct}$ (ohm) | $R_{CEI}$ (ohm) | $\omega$ (ohm/s <sup>1/2</sup> ) |
|----------|-------------|----------------|-----------------|----------------------------------|
| NMCP     | 5.005       | 591.9          | 21.332          | 0.413                            |
| NMCP/rGO | 3.995       | 102.7          | 32.37           | 30.19                            |



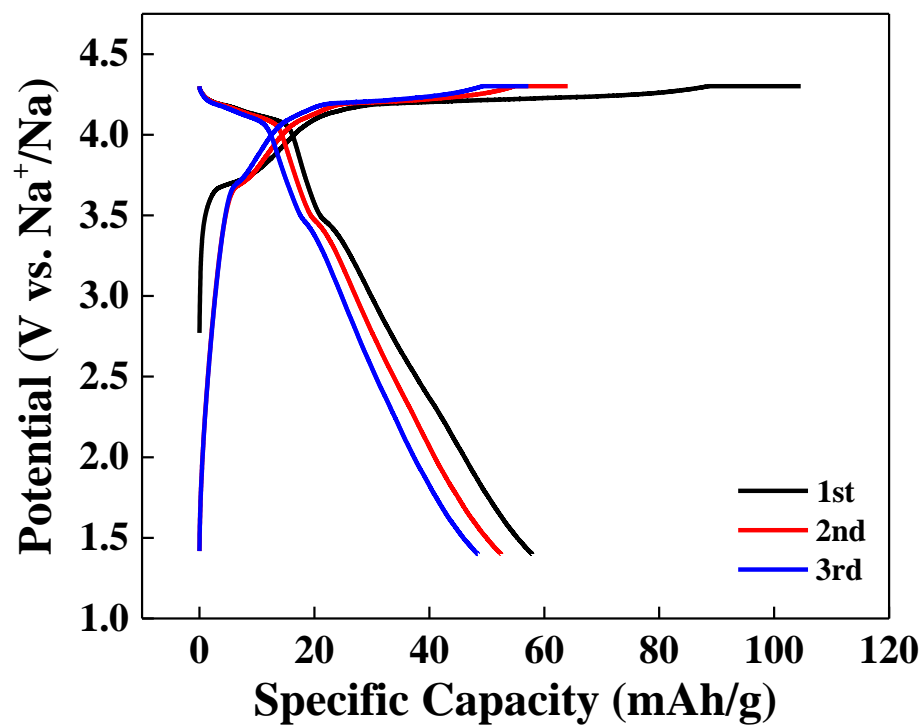

**Figure S6** Representative charge/discharge curves of NMCP at 0.01 A/g for three cycles.

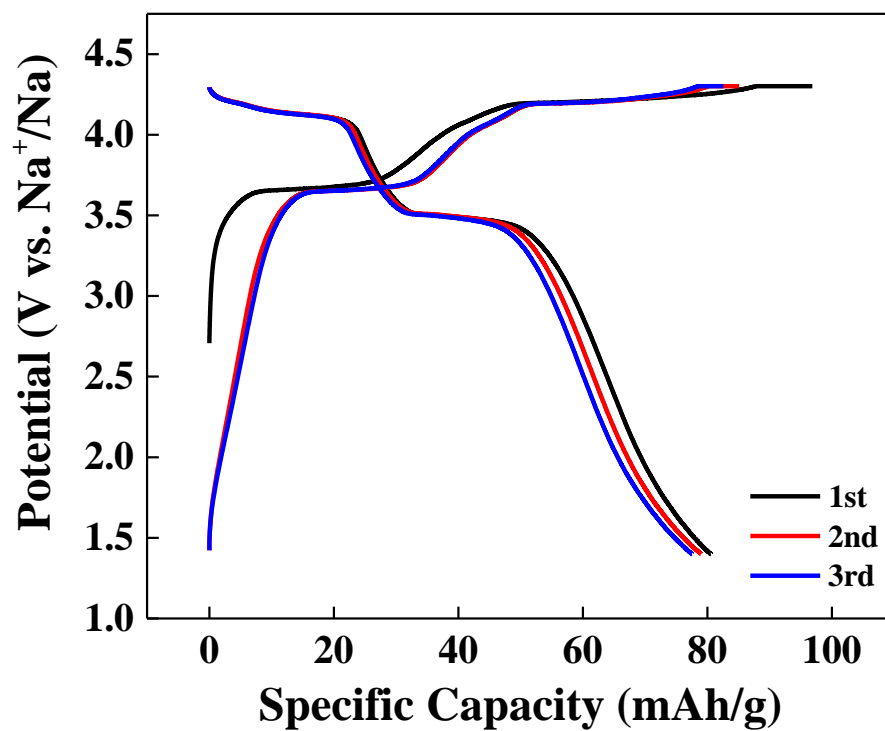

**Figure S7** Representative charge/discharge curves of NMCP/rGO at 0.01 A/g for three cycles.

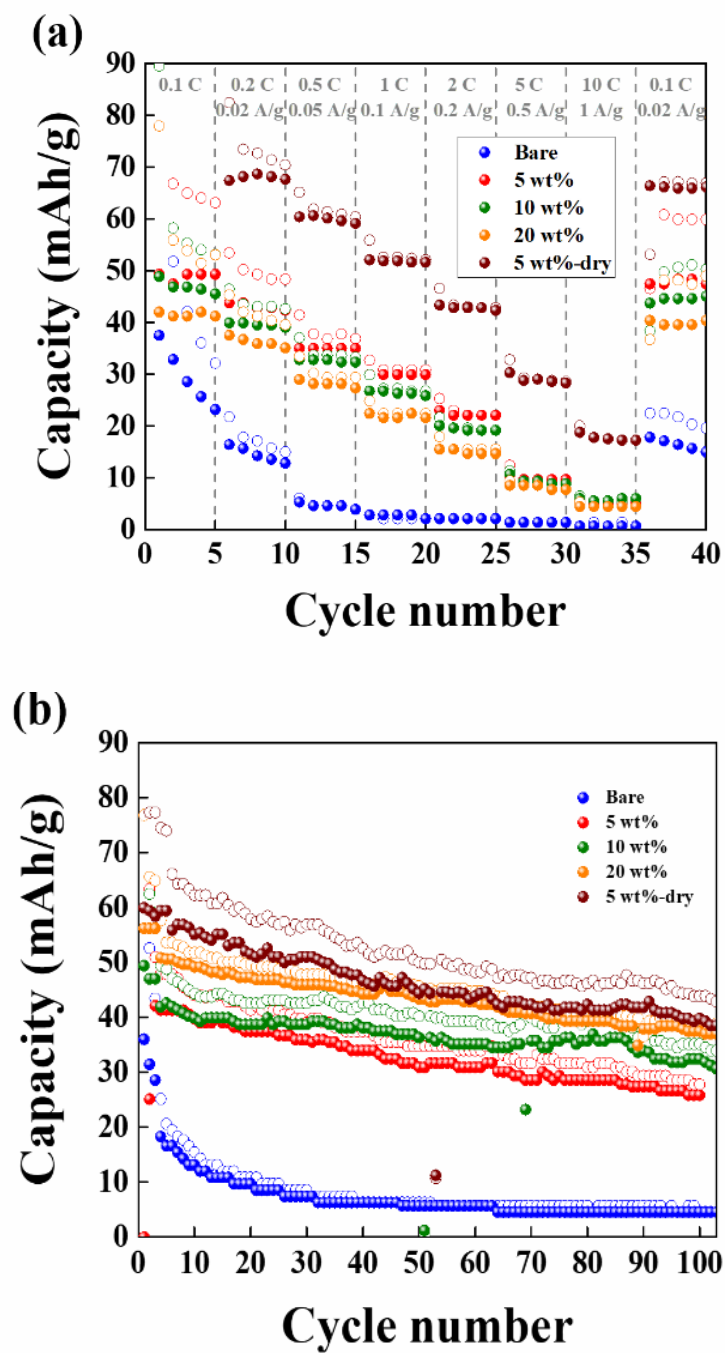

**Figure S8** Pristine NMCP and NMCP/rGO with different rGO content (a) C-rate (b) Cycle life.
